# Supplementary material
Source: publisher site journal article supplement (https://www.dovepress.com/article/427790)
Supplement: Supplementary file 1 [file get_supplementary_file.php]

Table S1 The linear relationship analysis between continuous variables and logit(p).

| Variables                               | MLE of lambda | Score Statistic(z) | P     |
|-----------------------------------------|---------------|--------------------|-------|
| Age (years)                             | 1             | -0.276             | 0.782 |
| Creatinine ( $\mu\text{mol/L}$ )        | 1             | 0.626              | 0.532 |
| Lactic acid ( $\text{mmol/L}$ )         | 1             | -1.176             | 0.240 |
| pH                                      | 1             | -0.484             | 0.629 |
| Cholinesterase (U/L)                    | 1             | -0.633             | 0.527 |
| Pro-BNP (pg/ml)                         | 1             | 0.411              | 0.681 |
| Blood urea nitrogen ( $\text{mmol/L}$ ) | 1             | 0.342              | 0.732 |
| Phosphorus ( $\text{mmol/L}$ )          | 1             | 1.148              | 0.251 |
| Magnesium ( $\text{mmol/L}$ )           | 1             | 0.091              | 0.928 |
| Total bilirubin ( $\mu\text{mol/L}$ )   | 1             | -0.248             | 0.804 |

Pro-BNP, pro-brain natriuretic peptide.

Table S2. Variance inflation factor of variables.

| Variables                              | VIF   |
|----------------------------------------|-------|
| Gender female                          | 1.063 |
| Age(years)                             | 1.117 |
| Creatinine ( $\mu\text{mol/L}$ )       | 2.288 |
| Lactic acid ( $\text{mmol/L}$ )        | 1.590 |
| Cholinesterase (U/L)                   | 1.253 |
| Pro-BNP (pg/ml)                        | 1.233 |
| Blood urea nitrogen( $\text{mmol/L}$ ) | 1.864 |
| Phosphorus ( $\text{mmol/L}$ )         | 1.522 |
| Magnesium ( $\text{mmol/L}$ )          | 1.121 |
| Total bilirubin ( $\mu\text{mol/L}$ )  | 1.106 |
| pH                                     | 1.564 |
| Respiratory failure                    | 1.337 |

Pro-BNP, pro-brain natriuretic peptide.

Table S3 The AUCs comparison of models based on logistic regression, SOFA, random forest, decision tree, SVM, Xgboost and Ensemble method.

| Model               | AUC (95% CI)        | P <sup>a</sup> |
|---------------------|---------------------|----------------|
| Logistic regression | 0.868 (0.826-0.910) | Reference      |
| SOFA                | 0.799 (0.744-0.854) | <0.001         |
| Random forest       | 0.865 (0.825-0.906) | 0.80           |
| Decision tree       | 0.835 (0.788-0.881) | 0.03           |
| SVM                 | 0.837 (0.786-0.887) | 0.02           |
| Xgboost             | 0.834 (0.788-0.881) | 0.03           |
| Ensemble            | 0.863 (0.821-0.905) | 0.50           |

<sup>a</sup> The significance was obtained by comparison to logistic regression model.
